# Supplementary material for: A New Resveratrol Trimer from the Roots and Stems of Vitis wenchowensis
Source: MDPI journal article supplement (doi:10.3390/molecules18077486), 2013-06-27

# Supplementary Materials

## General Experimental Methods

$^1\text{H}$  NMR spectra were recorded at 500 MHz, and  $^{13}\text{C}$  NMR spectra were recorded at 125 MHz with tetramethylsilane (TMS) and solvent signals as internal references. HR-ESI-MS data were acquired with a FT-ICR mass spectrometer. IR spectra were measured on a FT-IR spectrometer as KBr pellets. Column chromatography (CC) was carried out on silica gel (200–300 mesh from Qingdao Marine Chemical Co. Ltd., China).

## Chemicals

1,1-diphenyl-2-picrylhydrazyl (DPPH) were purchased from Sigma (St. Louis, MO, USA). Solvents (analytical grade) for extraction and CC were purchased from Huadong Chemicals (Hangzhou, China).

Figure S1.  $^1\text{H}$  NMR spectrum of 1.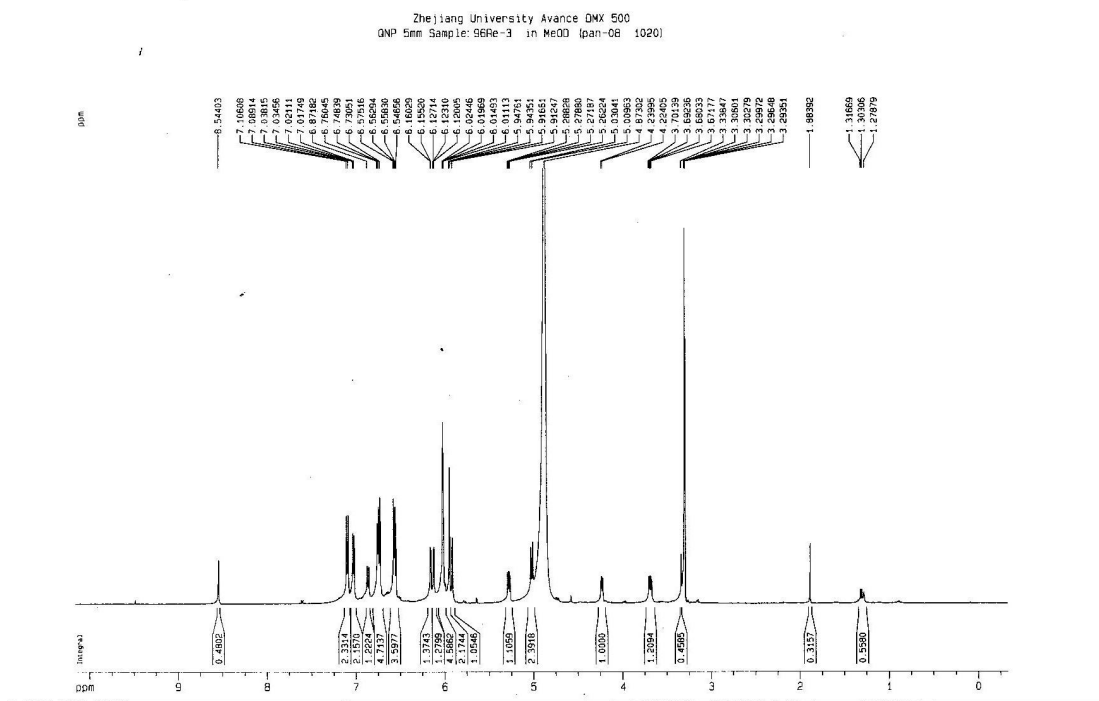Figure S2.  $^{13}\text{C}$  NMR spectrum of 1.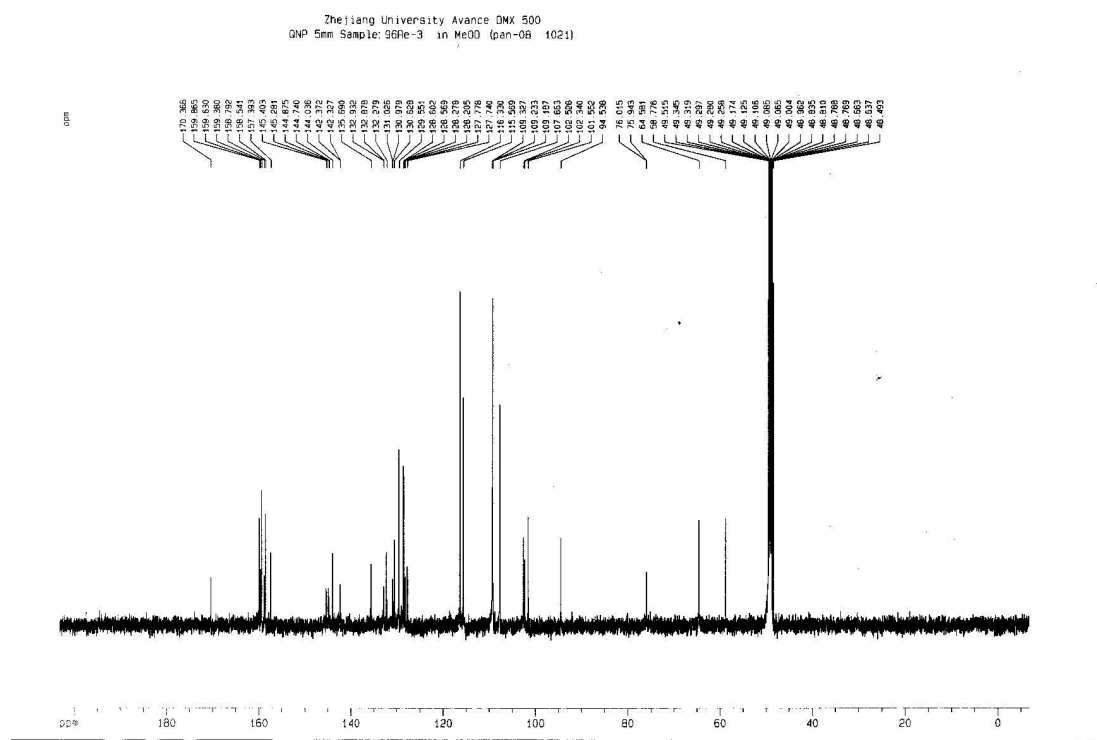

**Figure S3.** DEPT 135° spectrum of **1**.

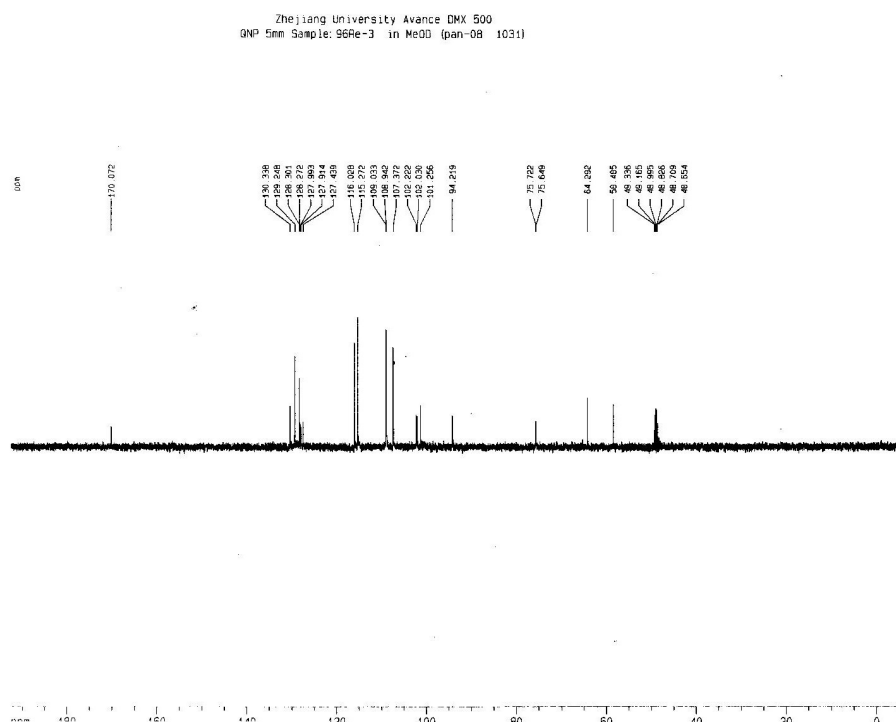

**Figure S4.**  $^1\text{H}$ - $^1\text{H}$  COSY spectrum of **1**.

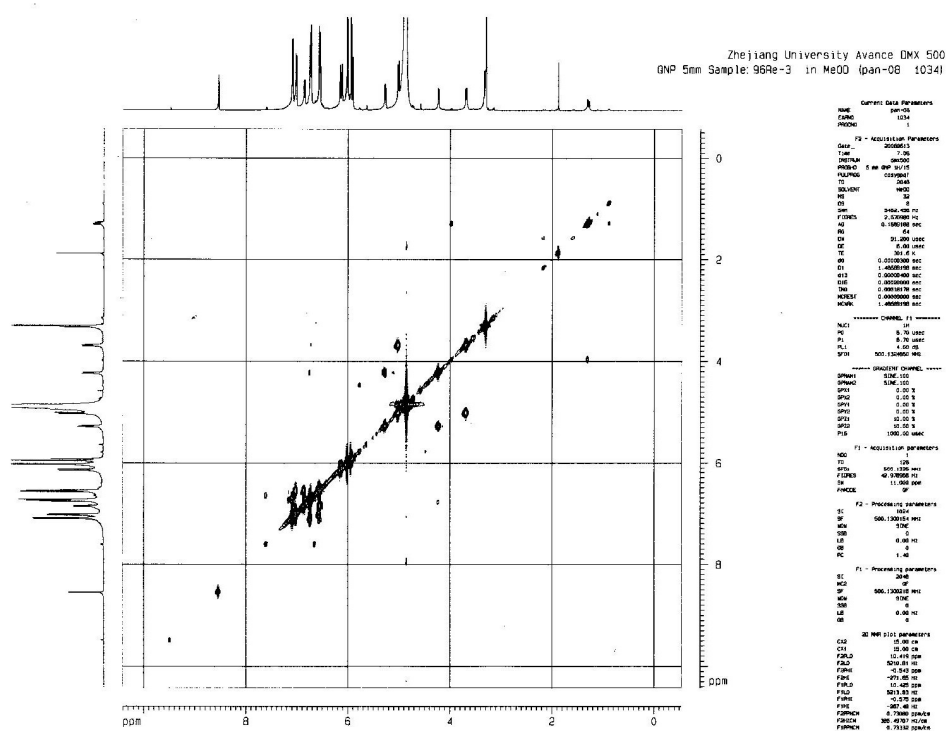

Figure S5. HMQC spectrum of 1.

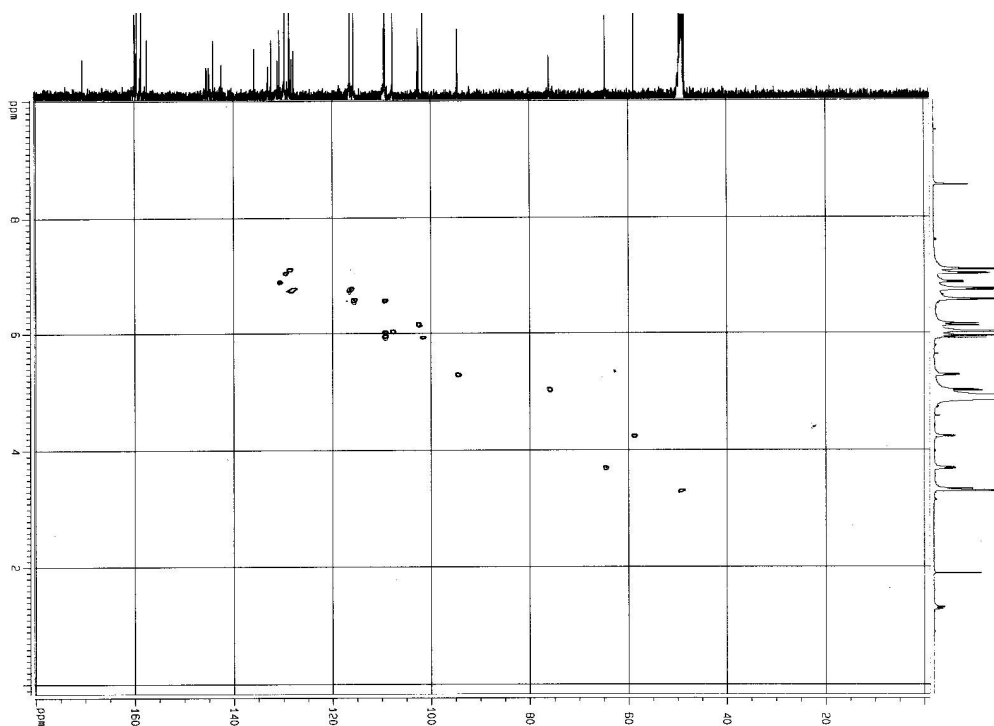

Figure S6. HMBC spectrum of 1.

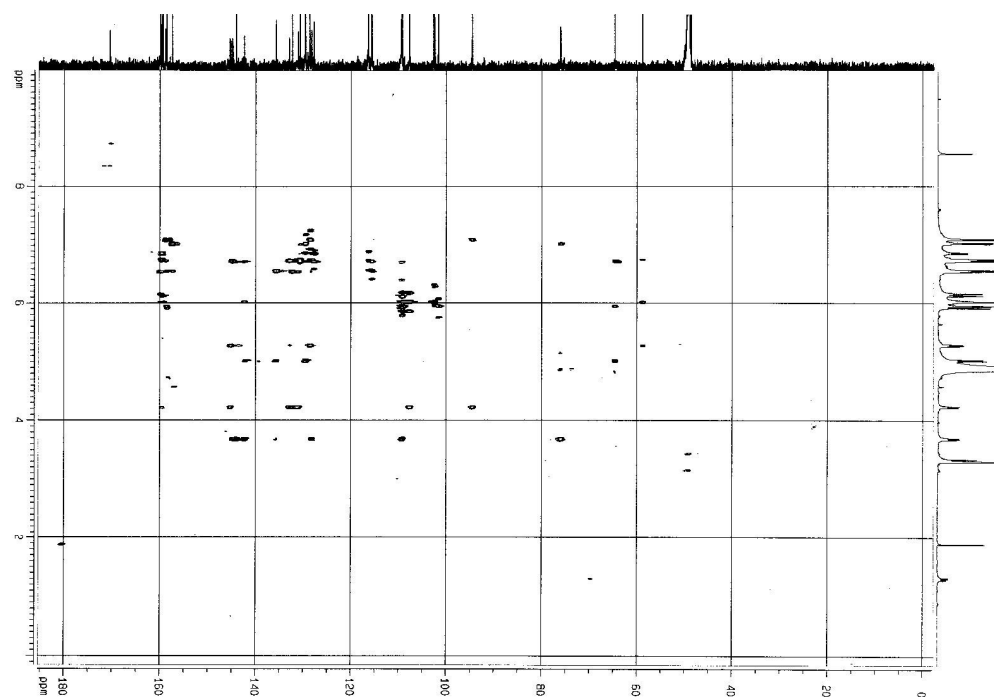

Figure S7. NOESY spectrum of 1.

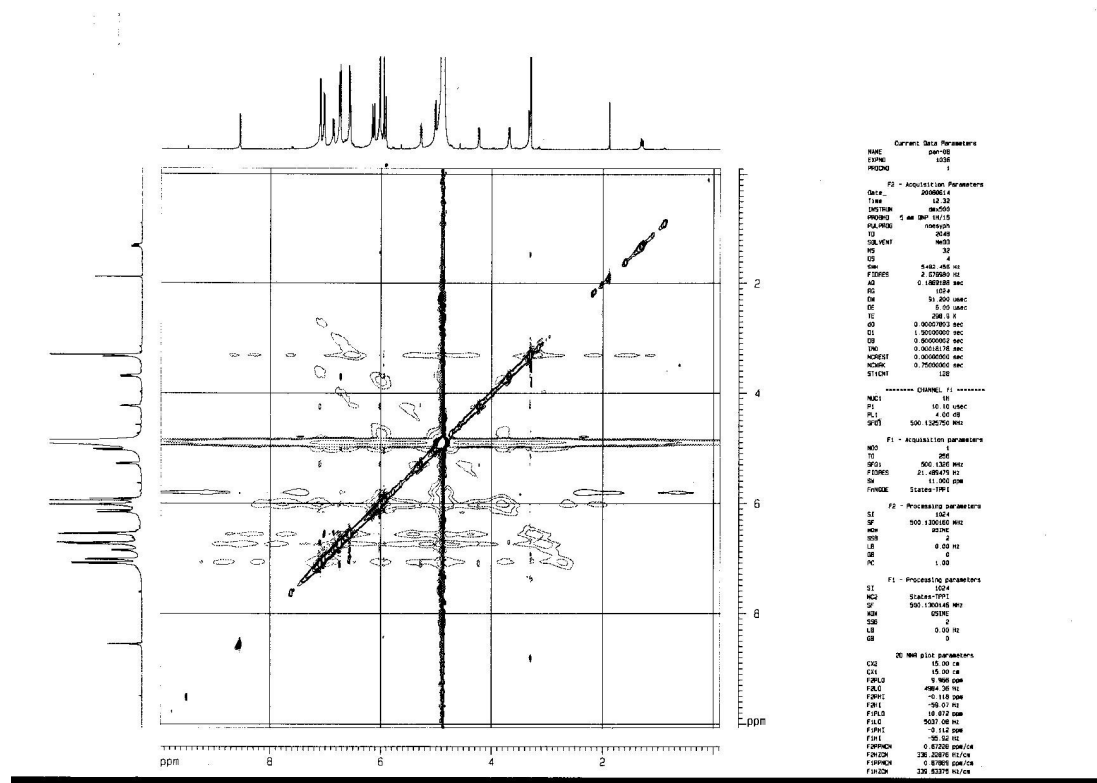

Figure S8. HRMS spectrum of 1.

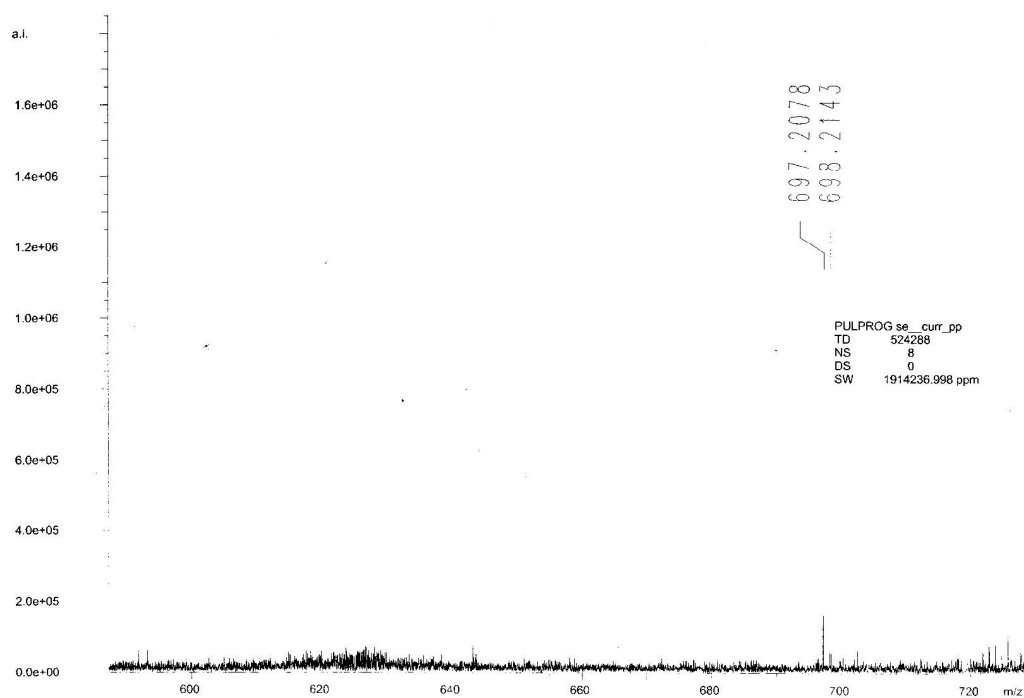

Supplement: s1 [file s1]
